# Supplementary material for: Sonochemical one pot synthesis of novel spiroacridines catalyzed by magnetically functionalized Fe3O4nanoparticles with chitosan as a reusable effective catalyst
Source: Royal Society of Chemistry journal article supplement (doi:10.1039/c6ra26386k), 2017-01-01

## SUPPLEMENTARY INFORMATION

Title: **Sonochemical one pot synthesis of novel spiroacridines catalyzed by magnetically functionalized Fe<sub>3</sub>O<sub>4</sub> nanoparticles with chitosan as a reusable effective catalyst**

Authors: Hossein Naeimi\* and Sepideh Lahouti

NMR data

<sup>1</sup>H NMR spectra of 3',3',6',6'-tetramethyl-10'-(4-nitrophenyl)-3',4',6',7'-tetrahydro-2H,2'H-spiro[acenaphthylene-1,9'-acridine]-1',2,8'(5'H,10'H)-trione(4a)

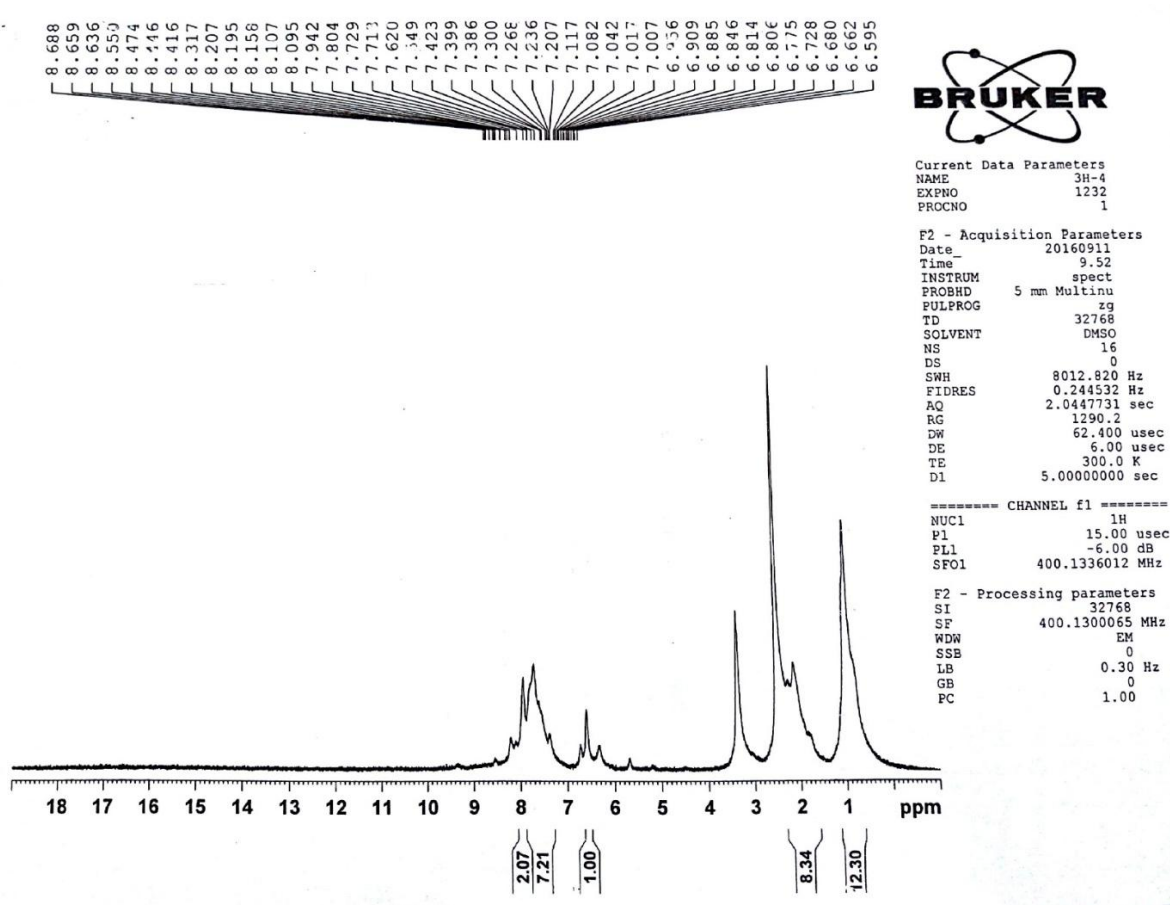

<sup>1</sup>H NMR spectra of 10'-(4-hydroxyphenyl)-3',3',6',6'-tetramethyl-3',4',6',7'-tetrahydro-2H,2'H-spiro[acenaphthylene-1,9'-acridine]-1',2,8'(5'H,10'H)-trione(4b)

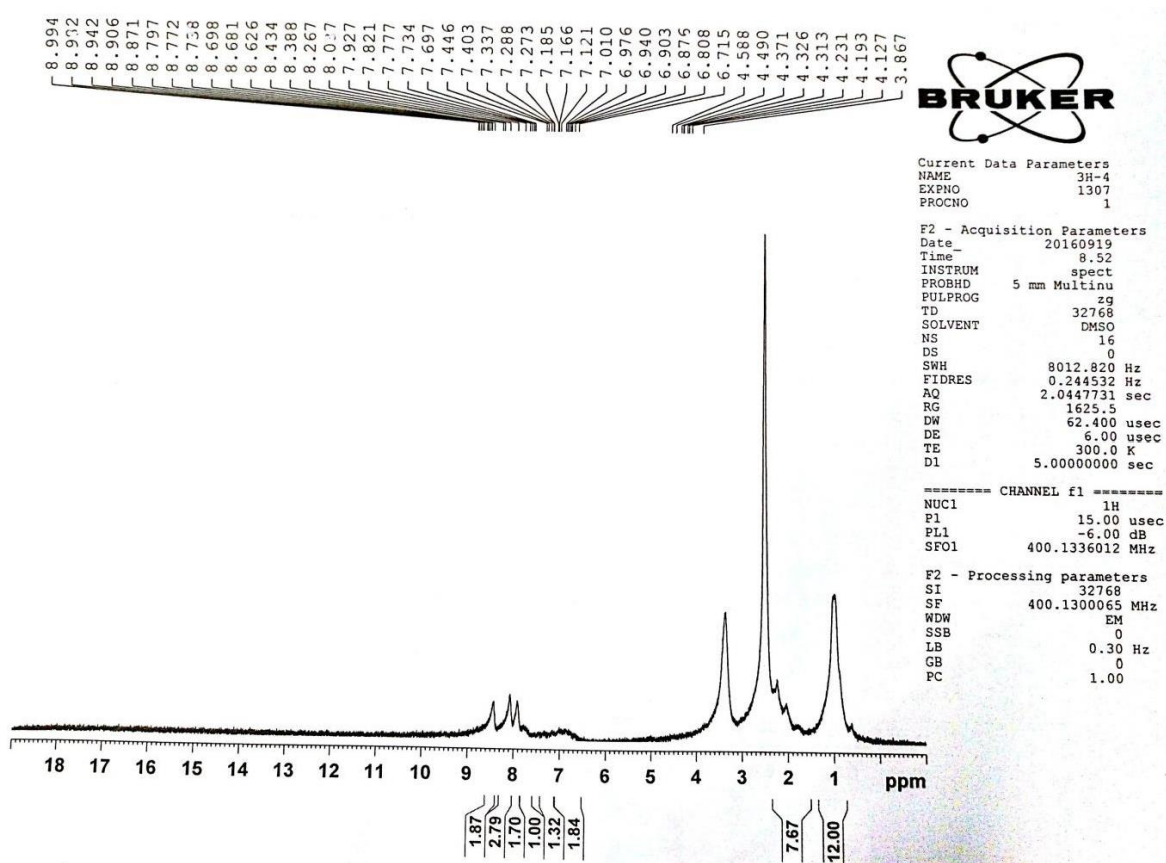

<sup>1</sup>H NMR spectra of 10'-(4-chlorophenyl)-3',3',6',6'-tetramethyl-3',4',6',7'-tetrahydro-2H,2'H-spiro[acenaphthylene-1,9'-acridine]-1',2,8'(5'H,10'H)-trione(4c)

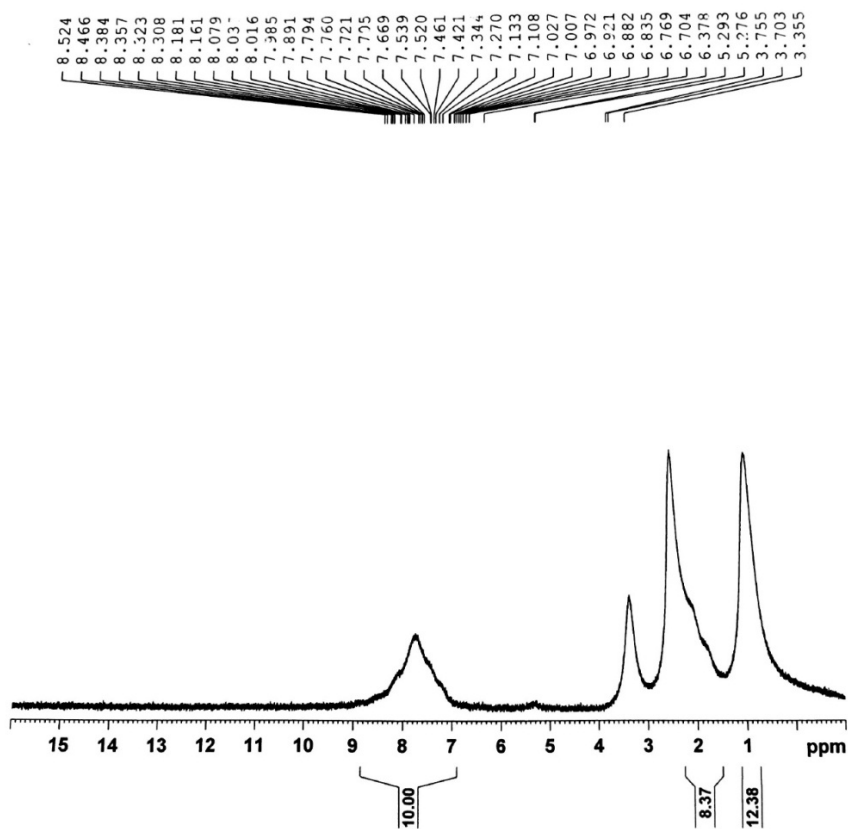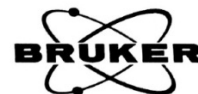

Current Data Parameters  
 NAME 3H-4  
 EXPNO 1240  
 PROCNO 1

F2 - Acquisition Parameters  
 Date\_ 20160911  
 Time 11.34  
 INSTRUM spect  
 PROBHD 5 mm Multinu  
 PULPROG zg  
 TD 32768  
 SOLVENT DMSO  
 NS 16  
 DS 0  
 SWH 8012.820 Hz  
 FIDRES 0.244532 Hz  
 AQ 2.0447731 sec  
 RG 1149.4  
 DW 62.400 usec  
 DE 6.00 usec  
 TE 300.0 K  
 D1 5.0000000 sec

----- CHANNEL f1 -----  
 NUC1 1H  
 P1 15.00 usec  
 PL1 -6.00 dB  
 SF01 400.1336012 MHz

F2 - Processing parameters  
 SI 32768  
 SF 400.1300065 MHz  
 WDW EM  
 SSB 0  
 LB 0.30 Hz  
 GB 0  
 PC 1.00

<sup>1</sup>H NMR spectra of 10'-(4-bromophenyl)-3',3',6',6'-tetramethyl-3',4',6',7'-tetrahydro-2H,2'H-spiro[acenaphthylene-1,9'-acridine]-1',2,8'(5'H,10'H)-trione(4d)

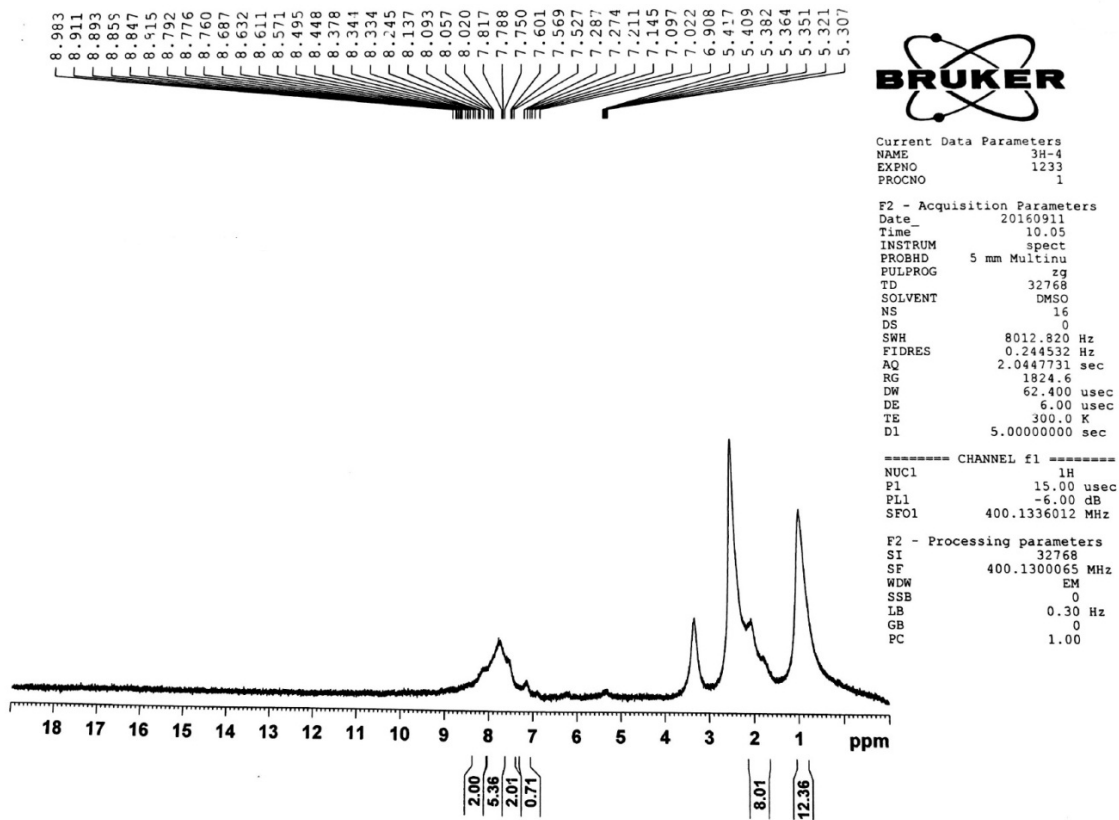

<sup>1</sup>H NMR spectra of 3',3',6',6'-tetramethyl-10'-(p-tolyl)-3',4',6',7'-tetrahydro-2H,2'H-spiro[acenaphthylene-1,9'-acridine]-1',2,8'(5'H,10'H)-trione(4e)

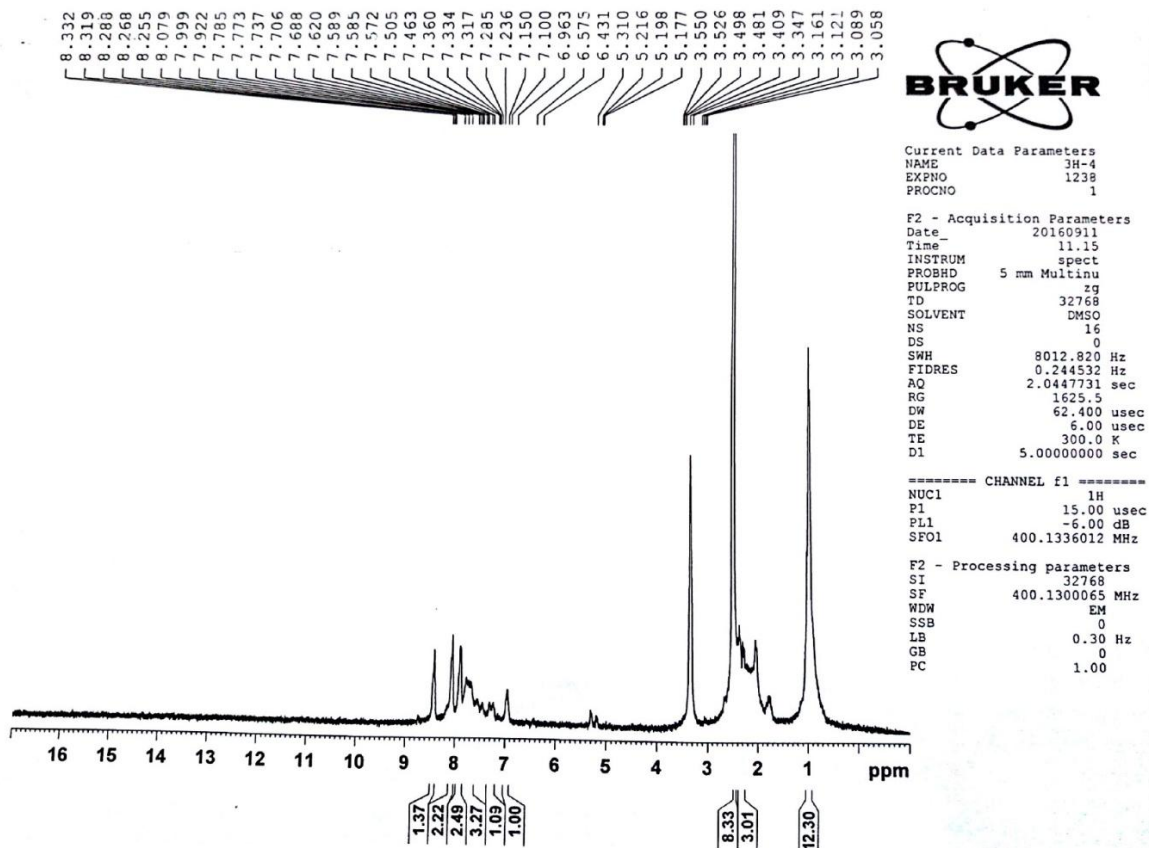

$^1\text{H}$  NMR spectra of 10'-(4-methoxyphenyl)-3',3',6',6'-tetramethyl-3',4',6',7'-tetrahydro-2H,2'H-spiro[acenaphthylene-1,9'-acridine]-1',2,8'(5'H,10'H)-trione(4f)

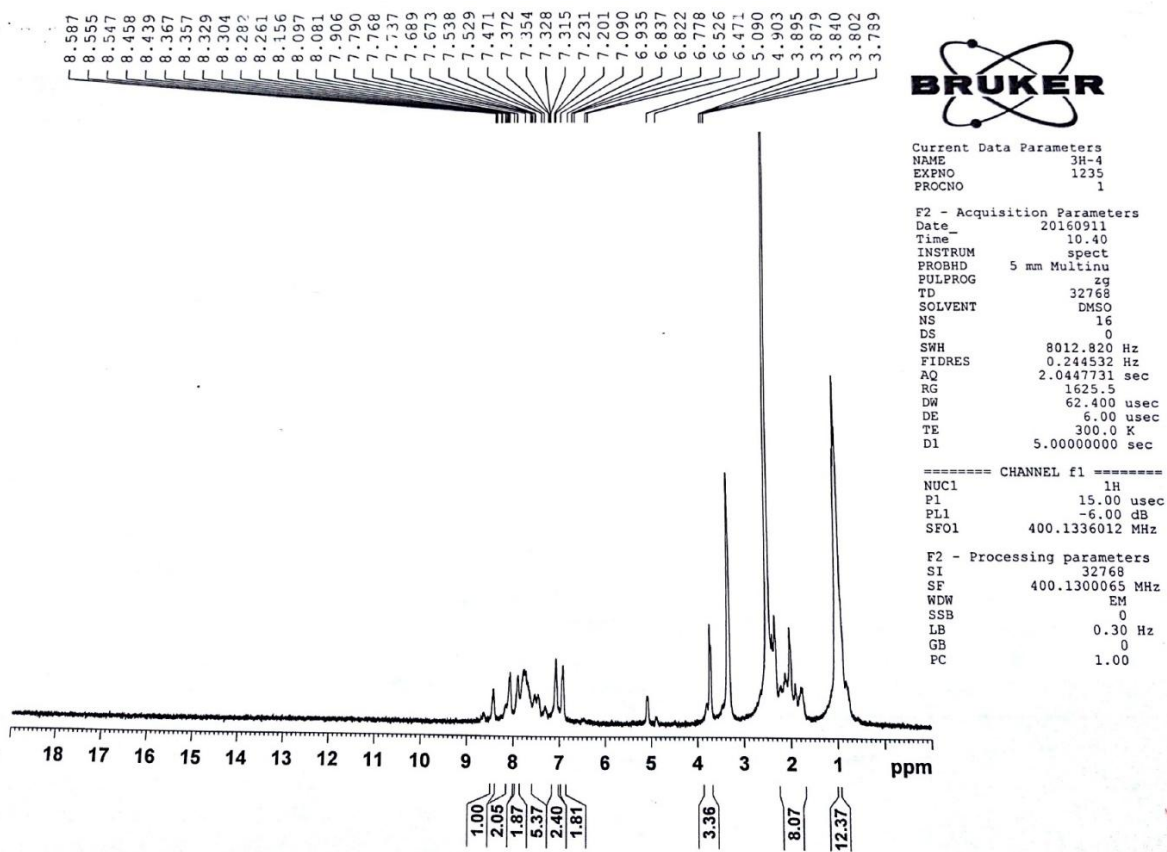

<sup>1</sup>H NMR spectra of 10'-(2-hydroxyphenyl)-3',3',6',6'-tetramethyl-3',4',6',7'-tetrahydro-2H,2'H-spiro[acenaphthylene-1,9'-acridine]-1',2,8'(5'H,10'H)-trione(4g)

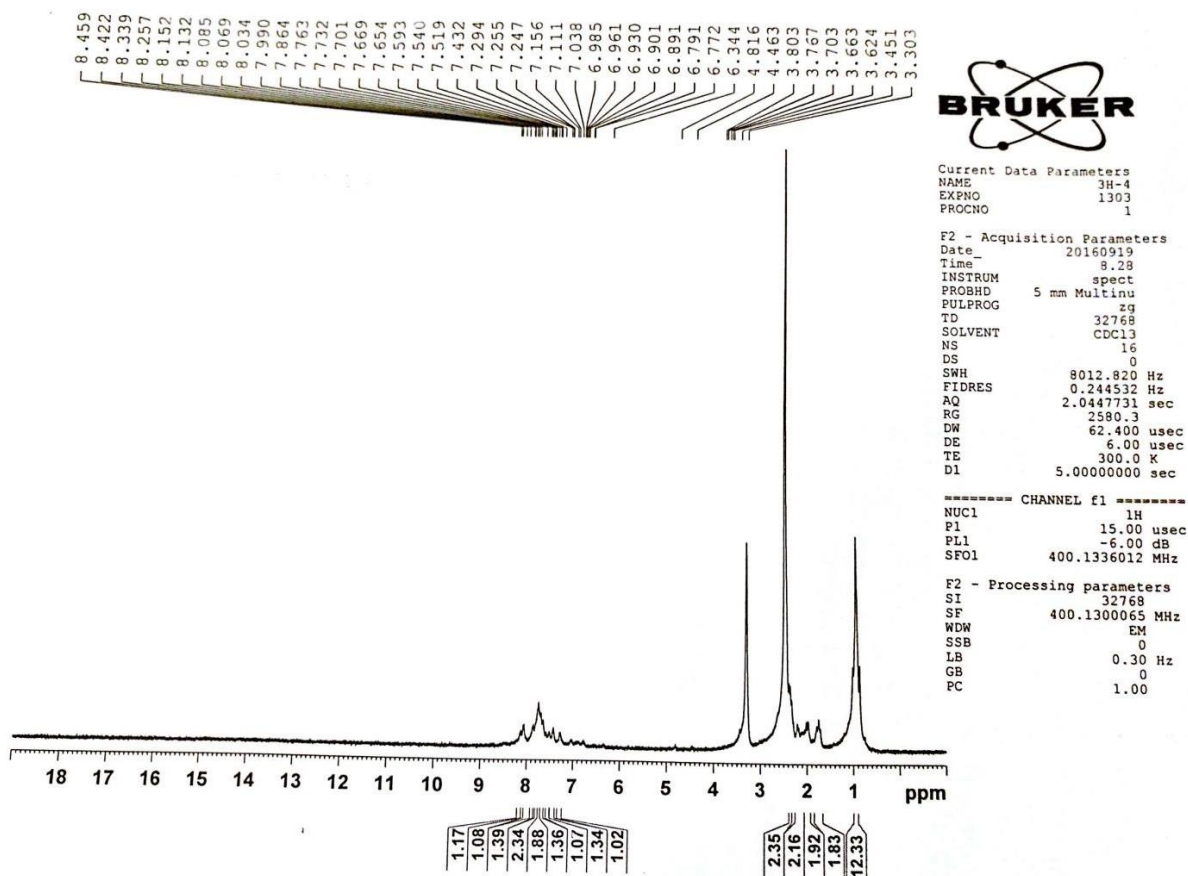

<sup>1</sup>H NMR spectra of 3',3',6',6'-tetramethyl-10'-(2-nitrophenyl)-3',4',6',7'-tetrahydro-2H,2'H-spiro[acenaphthylene-1,9'-acridine]-1',2,8'(5'H,10'H)-trione(4h)

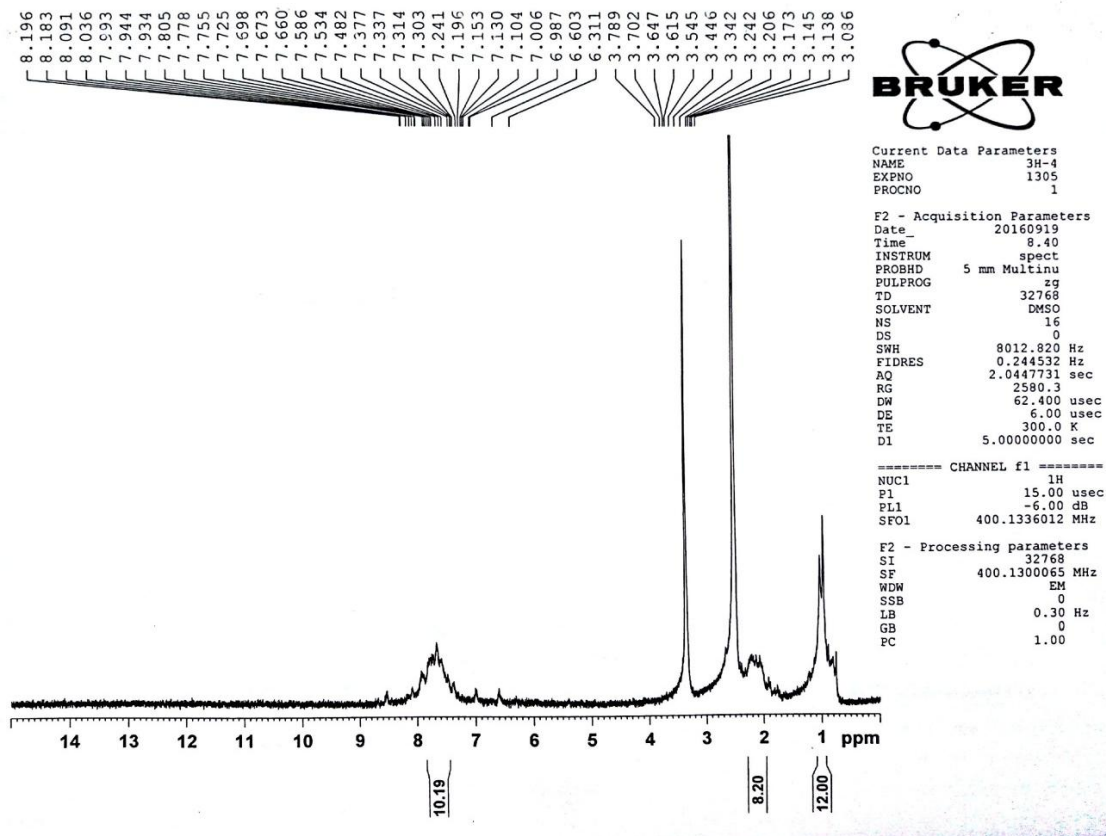



<sup>1</sup>H NMR spectra of 10'-(2-chlorophenyl)-3',3',6',6'-tetramethyl-3',4',6',7'-tetrahydro-2H,2'H-spiro[acenaphthylene-1,9'-acridine]-1',2,8'(5'H,10'H)-trione(4i)

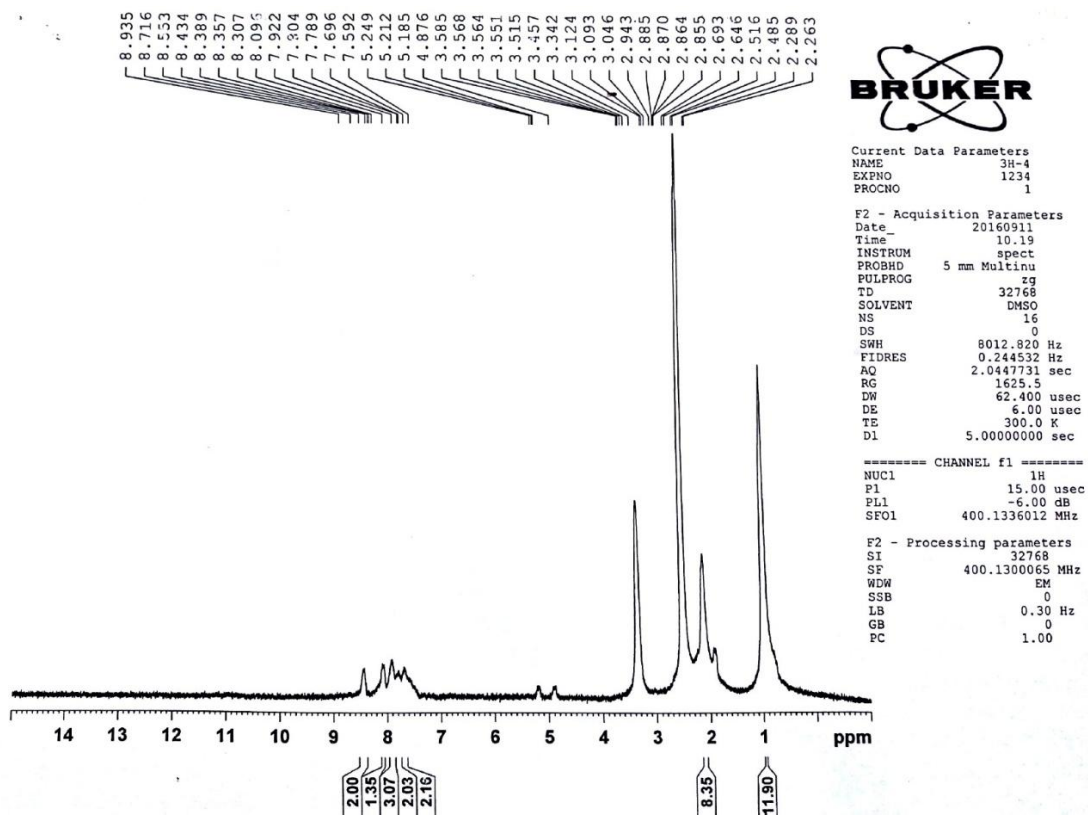

<sup>1</sup>H NMR spectra of 3',3',6',6'-tetramethyl-10'-(3-nitrophenyl)-3',4',6',7'-tetrahydro-2H,2'H-spiro[acenaphthylene-1,9'-acridine]-1',2,8'(5'H,10'H)-trione(4j)

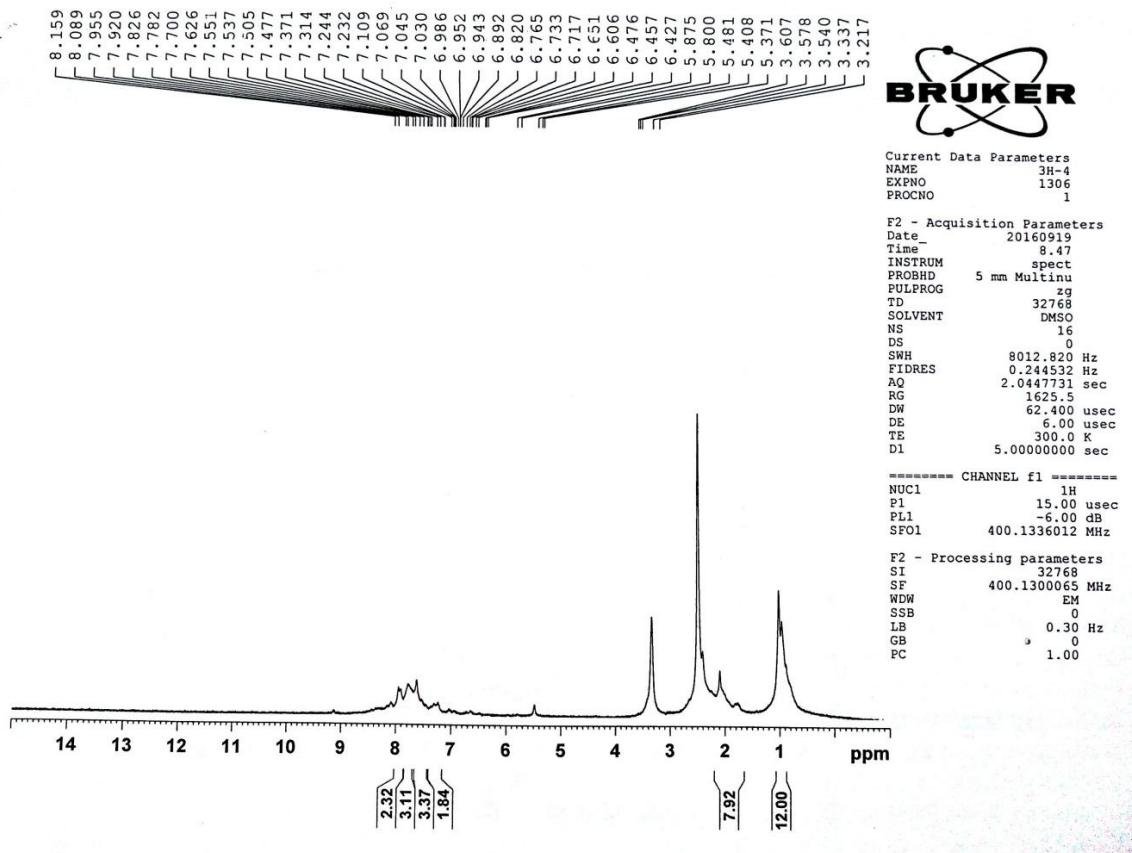

<sup>1</sup>H NMR spectra of 10'-(2,4-dimethylphenyl)-3',3',6',6'-tetramethyl-3',4',6',7'-tetrahydro-2H,2'H-spiro[acenaphthylene-1,9'-acridine]-1',2,8'(5'H,10'H)-trione(4k)

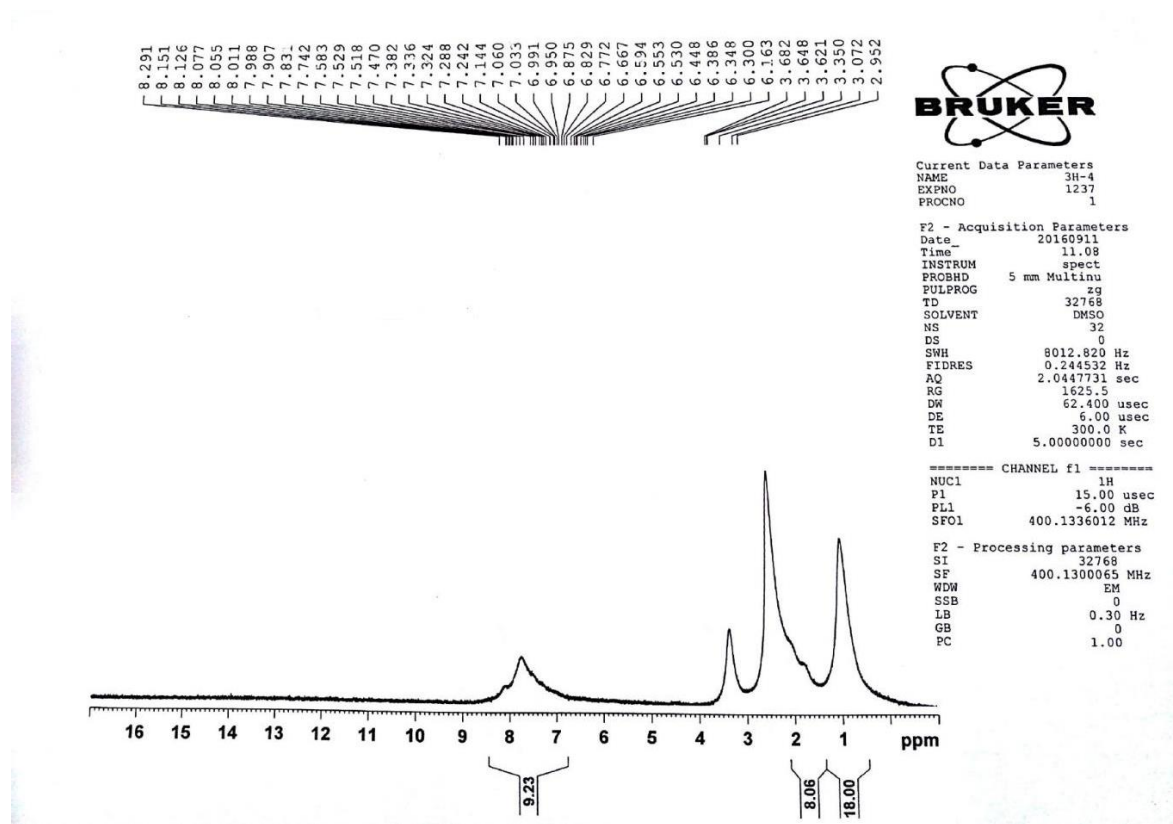

<sup>1</sup>H NMR spectra of 10'-benzyl-3',3',6',6'-tetramethyl-3',4',6',7'-tetrahydro-2H,2'H-spiro[acenaphthylene-1,9'-acridine]-1',2,8'(5'H,10'H)-trione(4I)

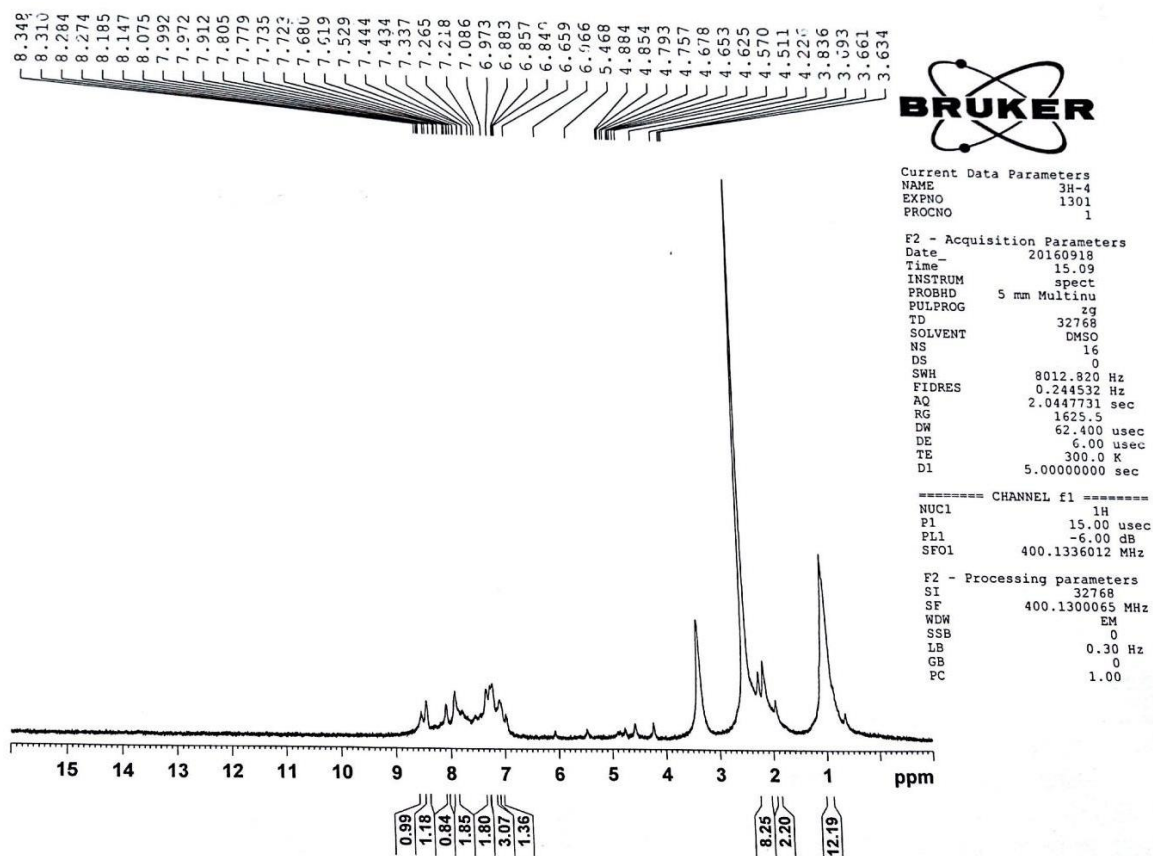

<sup>1</sup>H NMR spectra of 10',10'''-(1,4-phenylene)bis(3',3',6',6'-tetramethyl-3',4',6',7'-tetrahydro-2H,2'H-spiro[acenaphthylene-1,9'-acridine]-1',2,8'(5'H,10'H)-trione (4m)

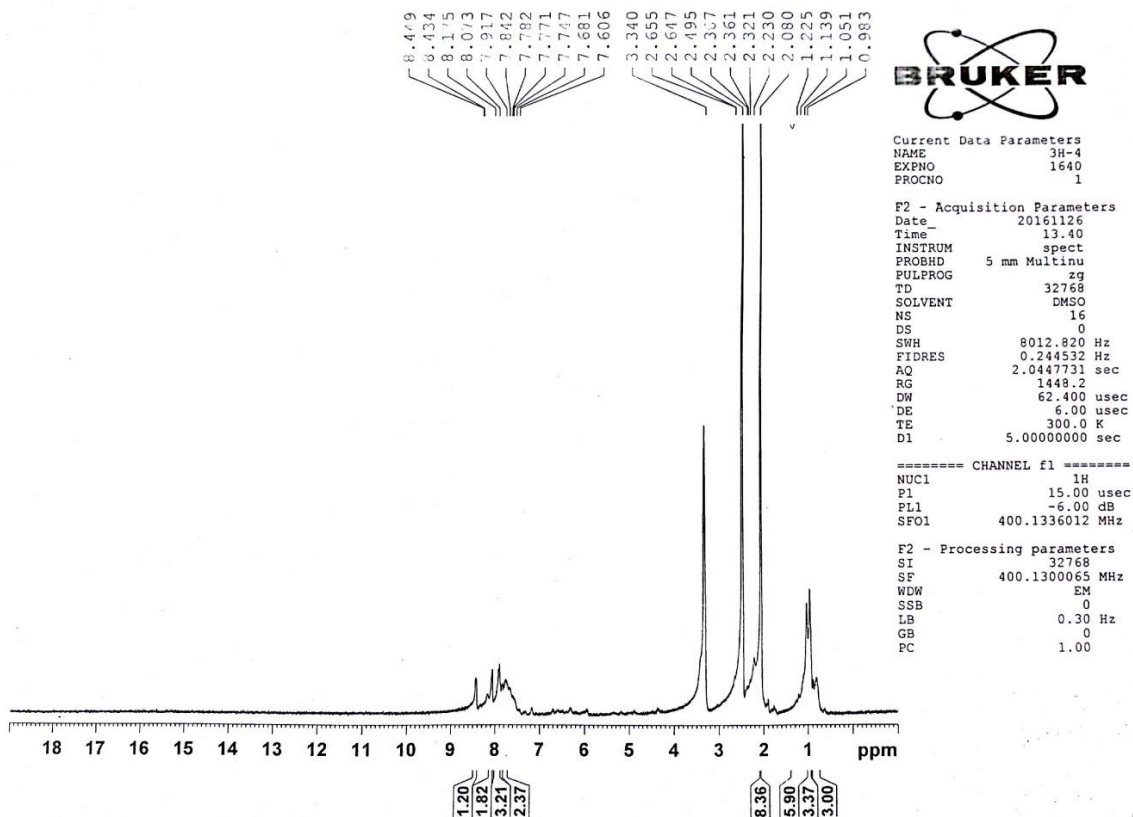

Supplement: c6ra26386k1.pdf [file c6ra26386k1.pdf]
